# Supplementary material for: Stepwise kinetics of the early-stage nucleation in chiral perovskites via ab initio molecular dynamics and free-energy calculations
Source: Royal Society of Chemistry journal article supplement (doi:10.1039/d4nr04735d), 2025-01-01
Supplement: d4nr04735d1.pdf [file d4nr04735d1.pdf]

## Supplementary Information

### Stepwise kinetics of the Early-Stage Nucleation in Chiral Perovskites via Ab Initio Molecular Dynamics and Free-Energy Simulations

Mariagrazia Fortino,<sup>a</sup> Gioacchino Schifino<sup>a</sup> Matteo Salvalaglio<sup>b</sup> and Adriana Pietropaolo<sup>\*a</sup>

---

<sup>a</sup> *Dipartimento di Scienze della Salute, Università "Magna Graecia" di Catanzaro, Catanzaro 88100, Italia.*

<sup>b</sup> *Thomas Young Centre and Department of Chemical Engineering, University College London, London WC1E 7JE, United Kingdom*

† Footnotes relating to the title and/or authors should appear here.

Supplementary Information available: [details of any supplementary information available should be included here]. See DOI: 10.1039/x0xx00000x

**Table S1.** Potential energy values calculated by averaging the potential energy across various configurations at fixed RMSD values and predicted through single point PBE-D3 calculations.

| RMSD (Å) | Averaged potential energy (Ry) | $\Delta E_{\text{average}}$ (kcal/mol) | Single point potential energy (Ry) | $\Delta E_{\text{SinglePoint}}$ (kcal/mol) |
|----------|--------------------------------|----------------------------------------|------------------------------------|--------------------------------------------|
| 0.0      | -1074.223541                   | 0.0                                    | -1074.249425                       | 0.0                                        |
| 0.5      | -1074.155852                   | 21.2                                   | -1074.155335                       | 29.5                                       |
| 1.0      | -1074.052601                   | 53.6                                   | -1074.040737                       | 65.5                                       |
| 1.5      | -1074.083856                   | 43.8                                   | -1074.083856                       | 50.2                                       |
| 2.0      | -1073.981819                   | 74.8                                   | -1074.006880                       | 76.1                                       |
| 2.5      | -1074.006880                   | 69.8                                   | -1074.006880                       | 73.0                                       |
| 3.0      | -1074.060389                   | 50.1                                   | -1074.051717                       | 62.0                                       |

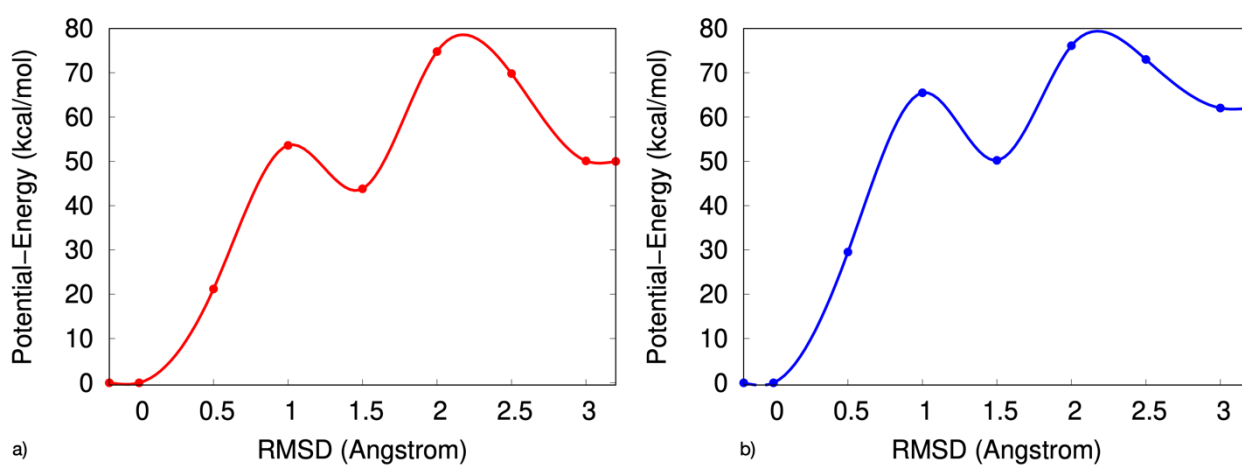

**Figure S1.** a) The potential energy surface as a function of the RMSD value, calculated by averaging the potential energy across configurations of the system at fixed RMSD values. b) Single point PBE-D3 calculations on configurations at fixed RMSD values.
